# Supplementary material
Source: PubMed Central journal article supplement (PMC10284149)

**A1)**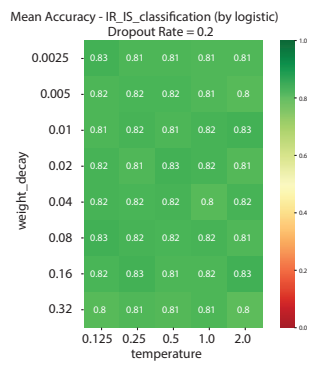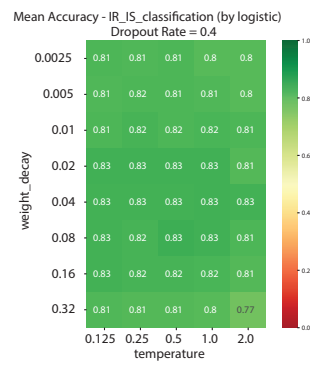**A2)**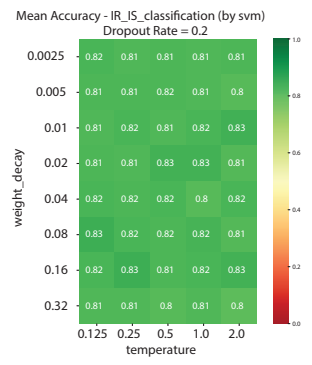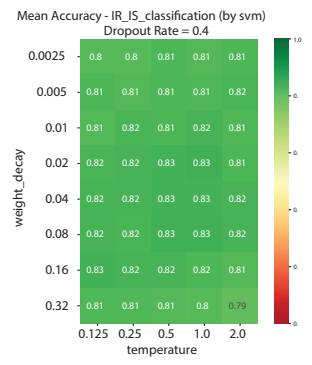**A3)**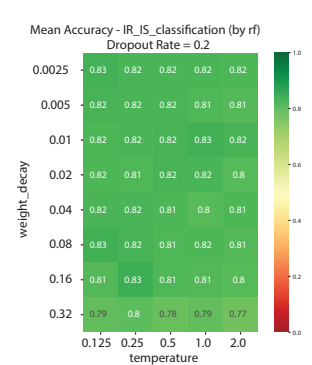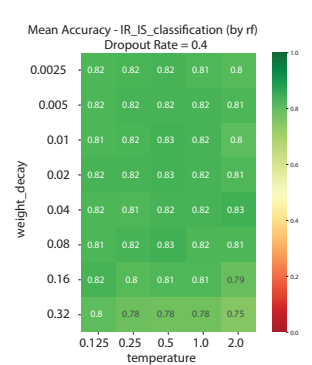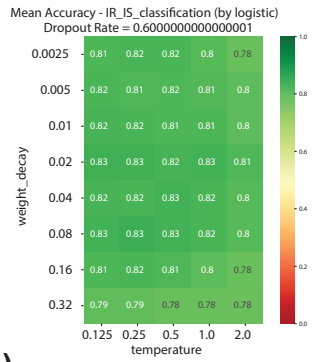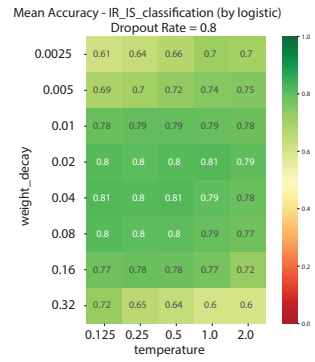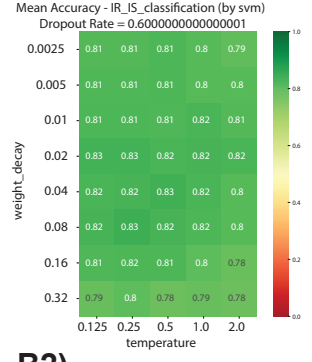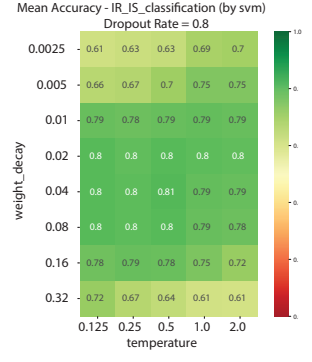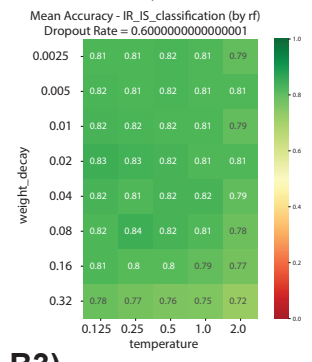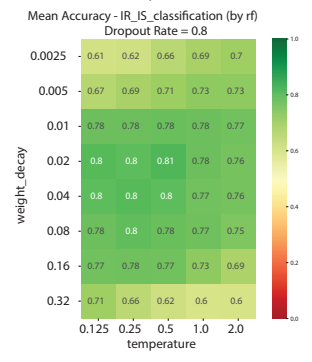**B1)**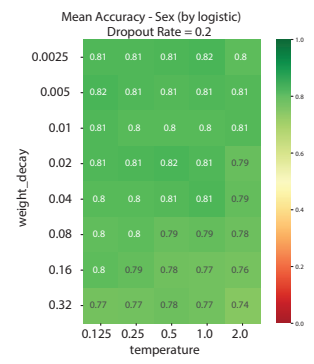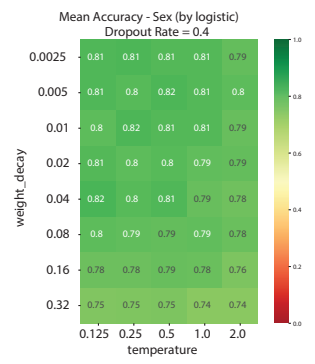**B2)**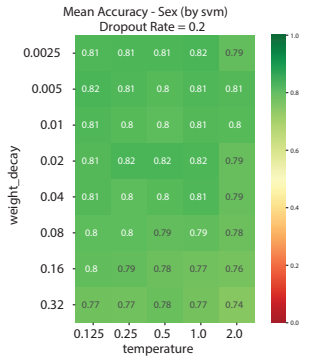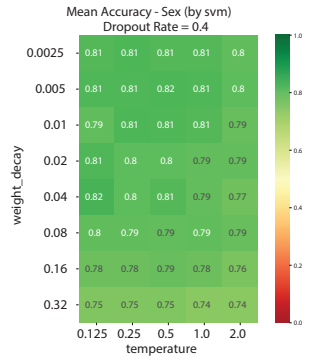**B3)**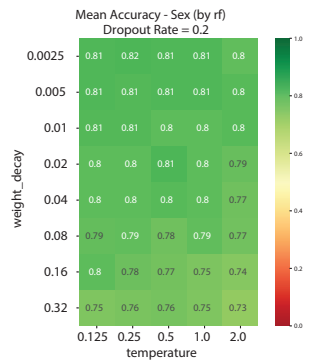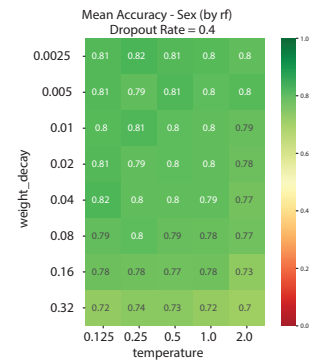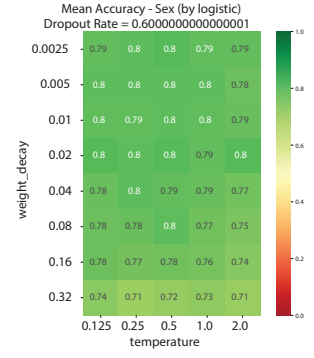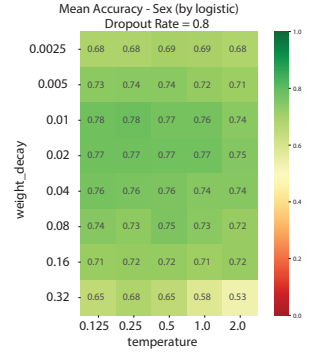

Supplement: NIHMS1860234-supplement-Supplementary_Figure_2.pdf [file NIHMS1860234-supplement-Supplementary_Figure_2.pdf]
