# Supplementary material
Source: PubMed Central journal article supplement (PMC10284149)

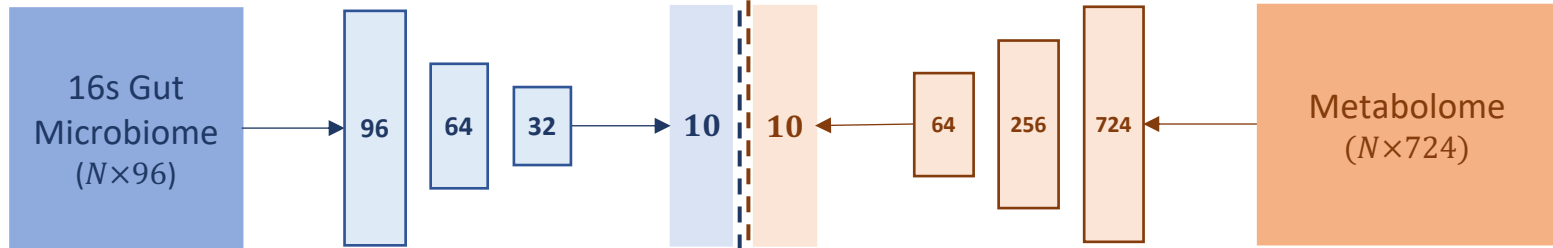

Encoder  $f^g(\cdot)$

Encoder  $f^m(\cdot)$

Supplement: NIHMS1860234-supplement-Supplementary_Figure_1.pdf [file NIHMS1860234-supplement-Supplementary_Figure_1.pdf]
